# Supplementary material
Source: PubMed Central journal article supplement (PMC3479592)
Supplement: 1207553109_pnas.201207553SI.pdf [file 1207553109_pnas.201207553SI.pdf]

# Supporting Information

Kellermann et al. 10.1073/pnas.1207553109

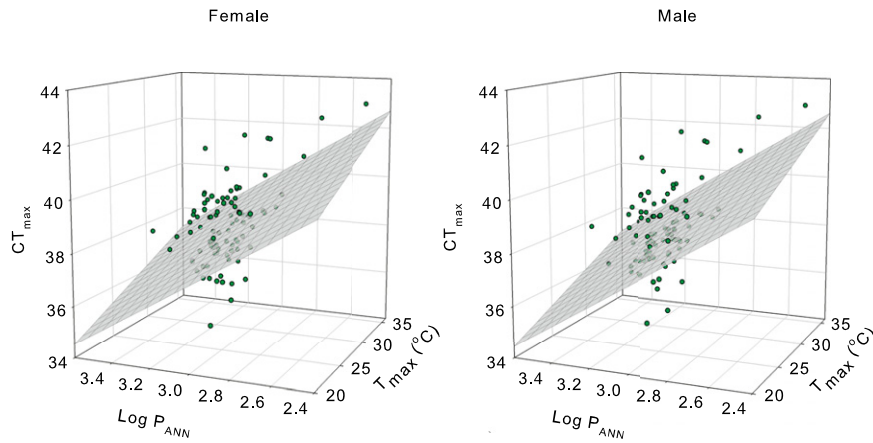

**Fig. S1.** Regression of critical thermal maximum ( $CT_{max}$ ) onto annual precipitation ( $P_{ANN}$ ) and maximum temperature of the warmest month ( $T_{max}$ ). Relationship between  $CT_{max}$  of 94 *Drosophila* species and the two climate variables [ $\log P_{ANN}$  (x axis) and  $T_{max}$  (z axis)] at their range center.

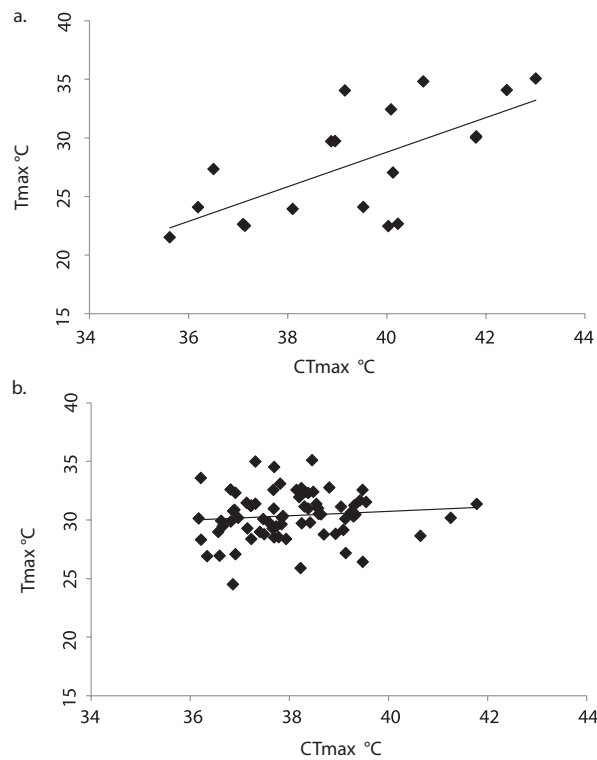

**Fig. S2.** Regressions of species divided by precipitation for females. The association between heat resistance ( $CT_{max}$ ) and maximum temperature ( $T_{max}$ ) for species occupying environments with (A)  $< 1,000$  mm annual precipitation and (B)  $\geq 1,000$  mm annual precipitation.

## Other Supporting Information Files

[Table S1 \(DOC\)](#)

[Table S2 \(DOCX\)](#)

[Table S3 \(DOC\)](#)
